1        **Mixed-cropping systems of different rice cultivars have**  
2        **grain yield and quality advantages over mono-cropping**  
3        **systems**

4  
5        Meijuan Li<sup>1</sup>, Jiaen Zhang<sup>1,2,3,\*</sup>, Shiwei Liu<sup>1</sup>, Umair Ashraf<sup>4,5</sup>, Shuqing Qiu<sup>1</sup>

6  
7        <sup>1</sup> Department of Ecology, College of Natural Resources and Environment, South  
8        China Agricultural University, Wushan Road, Tianhe District, Guangzhou 510642,  
9        P.R. China

10  
11        <sup>2</sup> Guangdong Provincial Engineering Technology Research Centre of Modern  
12        Eco-agriculture and Circular Agriculture, Guangzhou 510642, P.R. China

13  
14        <sup>3</sup> Key Laboratory of Agro-Environment in the Tropics, Ministry of Agriculture,  
15        Guangzhou 510642, P.R. China

16  
17        <sup>4</sup> Department of Agronomy, University of Agriculture, Faisalabad, 38040 Pakistan

18  
19        <sup>5</sup> Department of Crop Science and Technology, College of Agriculture, South China  
20        Agricultural University, Guangzhou 510642, P.R. China

21  
22        \* **Corresponding author**

23        *E-mail: jeanzh@scau.edu.cn*

24  
25  
26

## 27 **Abstract**

28 Mixed-cropping system is a centuries-old cropping technique that is still widely  
29 practiced in the farmers' field over the globe. Increased plant diversity enhances  
30 farmland biodiversity, which would improve grain yield and quality; however, the  
31 impacts of growing different rice cultivars simultaneously were rarely investigated. In  
32 present study, five popular rice cultivars were selected and ten mixture combinations  
33 were made according to the growth period, plant height, grain yield and quality, and  
34 pest and disease resistance. Seedlings of the five cultivars and ten mixture  
35 combinations (mixed-sowing of the seeds in an equal ratio, then mixed-transplanting  
36 and finally mixed-harvesting) were grown in plastic pots under greenhouse during the  
37 early and late growing seasons in 2016. Results showed that, compared with the  
38 corresponding mono-cropping systems, almost all combinations of the  
39 mixed-cropping systems have advantages in yield related traits and grain quality.  
40 Compared with the mono-cropping systems in the early and late growing seasons in  
41 2016, mixed-cropping systems increased the number of spikelets per panicle,  
42 seed-setting rate, and grain weight per pot and harvest index by 19.52% and 5.77%,  
43 8.53% and 4.41%, 8.31% and 4.61%, and 10.26% and 6.98%, respectively (paired  
44 t-test). In addition, mixed-cropping systems reduced chalky rice rate and chalkiness  
45 degree by 33.12% and 43.42% and by 30.11% and 48.13% in the early and late  
46 growing seasons, respectively (paired t-test). These results may be due to enhanced  
47 SPAD indexes and photosynthetic rates at physiology maturity in mixed-cropping  
48 systems. In general, it was found that mixed-cropping with different rice cultivars  
49 have potential for increasing grain yield and improving grain quality.

## 50 **Introduction**

51 Rice (*Oryza sativa* L.) is the primary food source for more than one-third of the  
52 world's population [1]. The socio-economic and climatic factors are negatively  
53 affecting rice production worldwide [2-4]. Recently, efforts have been made to  
54 modernize the rice production systems by replacing traditional farming systems with  
55 improved production practices and agricultural mechanization [5]. The traditional  
56 farming systems at small and large scale have greatly been replaced with intensified  
57 and highly mechanized mono-culture based cropping systems [6-8]. These production  
58 systems are largely rely on chemical fertilizers and pesticides which may cause  
59 significant surface and groundwater contamination and potential health risks [9,10].  
60 The intensive cropping increases the chances of soil erosion, greenhouse gas  
61 emission, pest resistance, and the loss of biodiversity. Hence, sustainable crop  
62 production systems are essential over the long term to meet the consumers' demand  
63 for better-quality food products [11,12].

64 Multi-cropping, refers to as 'intercropping' or 'mixed-cropping', is the growing  
65 multiple crop species/cultivars simultaneously in the same field for a significant part  
66 of their life cycle [6,13]. Numerous studies have reported how ecological processes  
67 result in yield advantages in mixed-cropping systems compared to those in  
68 mono-cropping systems. For example, studies on grasslands have shown that  
69 multi-species produced 15% higher yields than mono-crops [14]. Mixed-cropping has  
70 also been shown to produce 1.7 times more biomass than single species  
71 mono-cropping and to be 79% more productive than mono-cropping system [15]. In  
72 addition to yield, there are many other benefits of multiple-cropping such as enhanced  
73 soil fertility by intercropping with nitrogen-fixers [16], increased resilience against  
74 pests and diseases [17], and increased abiotic stress tolerance have also been  
75 previously reported [18,19]. These effects are attributed to higher levels of genetic  
76 diversity within those systems [6,7,16,20,21].

77 Furthermore, mixed-cropping systems are mainly used in tropical, small-scale  
78 subsistence farming [6], however, it may have some practical issues, such as drilling,

79 sowing, spraying and harvesting practices etc. Differing growth cycles and  
80 requirements for nutrients and pesticides make it difficult for growers to adapt new  
81 systems to manage and harvest mixed crops [6,21,22].

82 However, it is easy to operate the mixed-cropping systems when several cultivars  
83 belong to the same species(eco-types) , are mixed and seeded in the same field.  
84 Meanwhile, mixed-cropping systems may have higher resistance to diseases or pests,  
85 higher production, better grain quality, and may allow the situ production of formula  
86 rice (products with different rice varieties) easily. Till now, no work has been done to  
87 examine the effects of cultivating different rice genotypes in different combination on  
88 grain yield and quality of rice. Therefore, in this study, the seeds of different rice  
89 cultivars (possess different growth periods, plant heights, disease and pest resistance,  
90 grain yield and quality), were mixed and planted. It was hypothesized that a  
91 mixed-cropping system with different rice cultivars would have advantages over  
92 mono-cropping systems for a series of traits related to grain production and quality.

## 93 **Materials and Methods**

94 Experiments were conducted in 2016 during the early (March-July) and late growing  
95 seasons (August-November) of rice in the greenhouse at the Eco-Farm in the campus  
96 of South China Agricultural University (113°21'E, 23°09'N), Guangzhou, China. This  
97 region has a humid subtropical monsoonal climate characterized by warm winter and  
98 hot summers with an average annual temperature between 20°C and 22°C.

## 99 **Experimental details**

100 Five conventional indica rice cultivars of which four i.e., Yuenongsimiao,  
101 Yuxiangyouzhan, Huangguangyouzhan and Huanghuazhan were obtained from the  
102 Rice Research Institute of the Guangdong Academy of Agricultural Sciences and one  
103 i.e., Huahang 31 from the National Engineering Research Centre of Plant Breeding at  
104 South China Agricultural University (named as A, B, C, D and E, respectively) were  
105 used as plant material. Out of 26 possible 1:1 mixture combinations of five genotypes,  
106 we selected ten combinations i.e., BC, BE, AB, BCE, ACD, BDE, ABD, BCDE,

107 ABDE and ABCDE according to the growth period, plant height, grain yield, grain  
108 qualities, and resistance to diseases and pests of the five cultivars. The seed mixtures  
109 (mixing the seeds in an equal ratio) were sown in PVC trays and then the 35-day-old  
110 seedlings were transferred to the soil containing plastic pots (60×45×29 cm) filled  
111 with 30 kg of soil from paddy fields and grown in the greenhouse during the early and  
112 late growing seasons in 2016. The five cultivars were also grown in pure stands in  
113 mono-cropping systems as the corresponding controls. The experimental soil was  
114 sandy loam containing 25.44 g kg<sup>-1</sup> organic matter, 1.14 g kg<sup>-1</sup> total nitrogen, 0.84 g  
115 kg<sup>-1</sup> total phosphorous, 22.36 g kg<sup>-1</sup> total potassium and had a pH of 5.98. Before  
116 transplanting, 100 g of organic fertilizer (N, P<sub>2</sub>O<sub>5</sub>, K<sub>2</sub>O ≥6%, organic matter ≥46%)  
117 was applied per pot. There were 3 replications for 5 cultivars and 10 mixtures whilst 6  
118 hills (6 seedlings for each hill) with a planting space of 20 × 15 cm for each pot were  
119 maintained. A water layer of about 2-3 cm was maintained for the whole growth  
120 period.

## 121 **Trait measurements**

122 The photosynthetic rate (P<sub>n</sub>), relative chlorophyll contents (SPAD) and total  
123 aboveground dry weight (DW) were measured at physiological maturity. The  
124 maximum CO<sub>2</sub> assimilation rate per unit area (P<sub>n</sub>; μmol m<sup>-2</sup> s<sup>-1</sup>) was measured  
125 between 9:00 and 11:00 am using a Li-6400 portable photosynthetic system (Li-6400,  
126 Li-Cor, USA). Based on preliminary trials, the photosynthetic photon flux density was  
127 set at 1000 μmol m<sup>-2</sup> s<sup>-1</sup> for all rice cultivars. Both of the ambient CO<sub>2</sub> and air  
128 temperature were maintained at 390 μmol mol<sup>-1</sup> and 28°C, respectively. Relative  
129 chlorophyll contents of flag leaf were estimated with a SPAD meter (SPAD-502,  
130 Osaka, Japan). The plants were kept in oven at 80°C till constant weight for  
131 determination of dry biomass.

132 Grain yield and its components were measured according to the methods described  
133 by Peng et al. (2004) [23]. At maturity stage, plants were sampled from the plastic  
134 pots and the panicles were cut off into straw and panicle individuals. All spikelets  
135 were separated from the rachis (by manual threshing), and divided into filled and

136 unfilled rice by the Seeds Winnowing machine (CFY-II, 3.8m<sup>3</sup> min, max air pressure  
137 1300 pa, Hangzhou, China). The total number of spikelets, filled and unfilled, all of  
138 the half-filled spikelets were classically taken and averaged. The number of spikelets  
139 per panicle, grain-filling percentage ( $100 \times$  the number of filled spikelets / the total  
140 number of spikelets), and 1000-grain-weight were also calculated from sampled plants  
141 and averaged. Grain yield was recorded from each pot and the grain moisture was  
142 reduced to 14% by sun drying before being weighed.

143 Representative samples of about 250g of filled grains collected from each  
144 mono-cropping and mixed-cropping treatment were analyzed for grain quality. After  
145 dehulling and polishing rough rice, head rice (with length  $\geq 3/4$  of its total grain  
146 length) was weighed and used to calculate head rice yield. Physical traits such as  
147 chalky rice rate, chalkiness degree, grain length and width were scanned by a Plant  
148 Mirror Image Analysis (MICROTEK ScanMaker i800plus, Shanghai, China), and the  
149 image was processed with SC-E software (Hangzhou Wanshen Detection Technology  
150 Co., Ltd., Hangzhou, China). The standard iodine colorimetric method described in  
151 GB/T 15683-2008 (National Standard of the People's Republic of China, 2008) was  
152 used to measure amylose content and the Coomassie Brilliant Blue Staining method  
153 was used to measure the grain soluble protein contents.

## 154 **Data analysis**

155 The independent t-test was performed to evaluate the differences in traits between the  
156 mono-cropping and mixed-cropping treatments. For example, the data from A and B  
157 mono-cropping systems were pooled, and then compared with these data from AB  
158 mixed-cropping system. To assess the total effect of mixed-cropping, a paired analysis  
159 (t-test when data met assumptions of normality) and wilcoxon signed-rank test (when  
160 data did not meet the assumptions of normality) was carried out for all combinations  
161 and their mid-component average (the average of mixture components grown as  
162 mono-cropping). All the analyses were conducted in R 3.20 (R Foundation for  
163 Statistical Computing).

## 164 Results

### 165 Grain yield and its components

166 There were some significant differences in both yield and yield components between  
167 the mono-cropping and mixed-cropping systems for both early and late growing  
168 season in 2016 (Paired t-test, Tables 1 and 2). The spikelet per panicle, seed-setting  
169 rate, and grain weight per pot and harvest index were 19.52% and 5.77%, 8.53% and  
170 4.41%, 8.31% and 4.61%, and 10.26% and 6.98% higher in the mixed-cropping  
171 systems than those in the mono-cropping systems in the early and late growing  
172 seasons, respectively. In the early growing season, the mixed-cropping system  
173 improved the number of spikelets per panicle and seed-setting rate, compared with  
174 mono-cropping system, but statistically non-significant ( $P>0.05$ ) for some cases  
175 (Independent t-test). The grain weight per pot, only in the mixed-cropping systems of  
176 combinations of BC, ACD, BDE and ABDE, was significantly higher than that in the  
177 corresponding mono-cropping systems in the early growing season. Moreover, the  
178 grain weight was almost higher in the mixed-cropping systems in the early growing  
179 season and in most mixed-cropping combinations (except BE, ABD and ABCDE) in  
180 the late growing season, compared with the mono-cropping system. However,  
181 enhanced 1000-grain-weight was found only in some mixed-cropping systems in both  
182 the early and late growing seasons.

#### 183 **Table 1. Differences of yield and its components between mono-cropping and** 184 **corresponding mixed-cropping systems with several cultivars in the early** 185 **growing season of 2016.**

186 Note: Mean values ( $\pm$  SEs) of traits measured for mono-cropping systems and  
187 mixed-cropping systems. For each pair of combination we performed an independent  
188 t-test, and mean differences between mono-cropping systems and mixed-cropping  
189 systems were tested with paired t-tests. Mono, mono-cropping system; mix,  
190 mixed-cropping system. \*  $P<0.05$ ; \*\*  $P<0.01$ .

#### 191 **Table 2. Differences of yield and its components between mono-cropping and**

192 **corresponding mixed-cropping systems with several cultivars in the late growing**  
193 **season of 2016.**

194 Note: Table explanations are provided in Table 1.

## 195 **Grain quality**

196 For grain quality, chalky rice rate and chalkiness degree were significantly ( $P < 0.05$ )  
197 decreased in the mixed-cropping systems in the early growing season, while other  
198 traits were not significantly different from those in the mono-cropping systems.  
199 Further, the mixed-cropping systems reduced the chalky rice rate and chalkiness  
200 degree by 33.12% and 43.42%, and 30.11% and 48.13% in the early and late growing  
201 seasons, respectively (Paired t-test, Tables 3 and 4). In the early season, only for  
202 several cases, grain milling and appearance, cooking and nutritional qualities of the  
203 mixed-cropping systems were significantly ( $P < 0.05$ ) higher than those of the  
204 mono-cropping systems, whereas significant differences were found between  
205 mono-cropping and mixed-cropping systems in the late growing season (Independent  
206 t-test).

207 **Table 3 Differences of grain quality between mono-cropping and corresponding**  
208 **mixed-cropping systems with several cultivars in the early growing season of**  
209 **2016.**

210 Note: Table explanations are provided in Table 1.

211 **Table 4 Differences of grain quality between mono-cropping and corresponding**  
212 **mixed-cropping systems with several cultivars in the late growing season of 2016.**

213 Note: Table explanations are provided in Table 1.

## 214 **Photosynthetic rate, SPAD index and Total Aboveground** 215 **Dry Weight**

216 In both growing seasons, the photosynthetic rate for all mixed-cropping treatments  
217 was higher than that in the mono-cropping treatments, but non-significant for some  
218 cases at the maturity stage (Independent t-test, Figs 1a-b). Similar patterns were found



219 for SPAD index and total aboveground dry weight (Independent t-test, Figs 1c-f).  
220 Compared with the mono-cropping systems, SPAD index and Pn of the  
221 mixed-cropping systems were significantly higher in the early and late growing  
222 seasons (pair t-test, Fig. 1). Total aboveground dry weight was also significantly  
223 higher for the mixed-cropping treatments in the early growing season but not in the  
224 late growing season (pair t-test, Fig. 1). These results indicated that photosynthetic  
225 related traits (such as SPAD index and photosynthetic rate) were increased in the  
226 mixed-cropping systems, which may in turn enhance aboveground dry weight.

227 **Fig. 1 Differences between mono-cropping and corresponding mixed-cropping**  
228 **systems with several cultivars at the maturity stage in the early and late growing**  
229 **season of 2016: (a-b) SPAD index, (c-d) photosynthetic rate (P<sub>n</sub>), and (e-f) total**  
230 **aboveground dry weight.** Insets: differences in trait values between mixed-cropping  
231 systems and mono-cropping systems (paired t-test). White columns indicate  
232 mono-cropping systems and grey columns indicate corresponding mixed-cropping  
233 systems. \* and \*\* represent significance differences at  $P < 0.05$  and  $P < 0.01$  levels,  
234 respectively; ns indicates non-significant.

## 235 **Correlations analyses**

236 Pn was significantly ( $P < 0.05$ ) and positively correlated with DW ( $r=0.67$  for the  
237 early growing season), seed-setting rate ( $r=0.59$  and  $r=0.74$ ), grain weight per pot  
238 ( $r=0.53$  and  $r=0.60$ ) and harvest index ( $r=0.77$  and  $r=0.63$ ) for the early and late  
239 growing seasons, respectively (Table 5). A similar pattern was observed for the SPAD  
240 index. The results indicated that higher Pn and SPAD index may lead to higher grain  
241 yield and yield related traits.

242 Significantly positive correlations between SPAD index and milled rice rate, whole  
243 milled rice rate and protein content were noticed, whilst negative correlations between  
244 SPAD index and chalky rice rate were found in the early season (Table 5). Pn was  
245 positively correlated with brown rice rate, whole milled rice rate and protein content,  
246 whilst negatively correlated with chalky rice rate, chalkiness degree and brown rice  
247 rate in the early season. Similar patterns were found in the late season.

248 **Table 5 Correlations analysis between photosynthetic parameters, SPAD index**  
249 **at the maturity stage and yield related traits and grain quality in the early and**  
250 **late growing seasons in 2016.**

251 Note: \*and \*\* represent significance at  $P < 0.05$  and  $0.01$  levels, respectively.

## 252 **Discussion**

253 Scientists have different opinions regarding mixed-cropping owing to pre-sowing  
254 mixing of seeds of different cultivars/genotypes. For instance, some have found this  
255 practice was superior to the mono-cropping [24-27], whilst some regarded it as  
256 inferior to the mono-cropping regarding yield benefits [28], and others found it  
257 depended on the combinations of varieties [29].

258 Our results showed that compared with mono-cropping systems, mixed-cropping  
259 systems indeed have advantages in yield related traits e.g., the number of spikelets per  
260 panicle, seed-setting rate, grain weight and harvest index, as well as grain quality  
261 traits, e.g. chalky rice rate and chalkiness degree. Positive effects of mixed-cropping  
262 systems on plant production generally rely on functional differences between cultivars  
263 [30,31]. For example, mixing of seeds of those cultivars having exactly the same  
264 functional characteristics would not lead to any additive effect in yield and/or overall  
265 production. Previously, it was reported that sometimes seed mixture of different  
266 genotypes could lead to yield benefits over individual potential of one cultivar as  
267 mono-cropping system. For example, Dubin and Wolfe (1994) [32] reported a 2%  
268 increase in grain yield in three-way wheat (*Triticum aestivum* L.) variety mixtures  
269 compared with those in pure lines. Helland and Holland (2001) [25] also found an  
270 increase of 3% in three oat (*Avena sativa* L.) varieties when grown in mixture rather  
271 than mono-crop. Likewise, Gallandt et al. (2001) [33] demonstrated that winter wheat  
272 mixtures of two cultivars resulted in 1.5% yield advantage over pure lines, whereas  
273 Sarandon and Sarandon (1995) [34] reported that two-way bread wheat mixtures  
274 increased the aboveground dry weight by 8% as compared with pure lines.

275 Our experimental results showed that the Pn, SPAD index and total aboveground  
276 dry weight of the mixed-cropping systems were higher than the component cultivars

277 that were grown in pure lines (Fig. 1). Enhanced Pn and SPAD index might lead to  
278 the improved performance of rice mixtures. Chlorophylls contents (expressed as  
279 SPAD index), is one of the most important factors associated with photosynthetic rate,  
280 as well as crop biomass and economic yield in rice [35]. Enhanced photosynthetic rate  
281 even at the single-leaf level was recently been found to be a significant contributor in  
282 improving crop productivity [36,37]. Furthermore, positive correlations between the  
283 photosynthetic rate, SPAD index, total aboveground dry weight and the grain weight  
284 per pot in the early and late growing seasons were also observed at the maturity.  
285 These results in our study with a real mixed-cropping (growing two or more rice crops  
286 simultaneously without definite row arrangement on the same paddy field, i.e. with  
287 real mixed-sowing of the seeds in an equal ratio, then mixed-transplanting and finally  
288 mixed-harvesting) further corroborate previous study findings which indicate that  
289 ‘mixed-cropping systems’ (growing different crop cultivars with definite row  
290 arrangements) and ‘intercropping systems’ (growing two or more crops  
291 simultaneously with definite row arrangement on the same piece of land) improved  
292 the rice stand establishment and resource use efficiency than mono-cropping systems  
293 [7,20,38]. In addition, mixed-cropping systems may have benefit in exploiting  
294 available resources in a better way than mono-cropping systems and would thus lead  
295 to improved grain yield and harvest index [27,29].

296 Grain quality includes grain appearance and milling, eating, cooking, and  
297 nutritional qualities. Genetic, environmental and crop management factors generally  
298 affect the grain quality of rice. Our study showed that the chalky rice rate and  
299 chalkiness degree of mixed-cropping systems were decreased compared to that of the  
300 mono-cropping systems (Tables 3 and 4). Furthermore, negative correlations among  
301 SPAD index, Pn and total aboveground dry weight as well as chalky rice rate with  
302 chalkiness degree in both growing seasons were recorded. Increased Pn, SPAD index  
303 and the total aboveground dry weight observed in the mixed-cropping systems at  
304 maturity (Pair t-test, Fig. 1) may in turn contribute to the lower chalky rice rate and  
305 chalkiness degree. Several studies found that reduction of Pn at the maturity would  
306 increase the occurrence of chalky grains [39,40], while increased Pn of rice leaves

307 resulting in the reduction of chalky rice rate and chalkiness degree.

308 Furthermore, no significant differences for grain quality traits i.e., brown rice rate,  
309 milled rice rate, whole milled rice rate, amylose rate, protein content, or length/width  
310 were found between mixed-cropping systems and mono-cropping systems, and also  
311 inconsistent for both the growing seasons (Tables 3 and 4). These inconsistent quality  
312 parameters during both the growing seasons were possibly related to environmental  
313 differences between the early and late growing seasons [41,42]. Effects of cultivating  
314 varieties from the same species with mixed seedling, transplanting and harvesting on  
315 grain amylose rate, protein content, and length/width are still poorly understood.  
316 Previously, in a study focused on a barley-oats mixed system, Jokinen (1991) [43]  
317 found that protein content was varied substantially in mixed cropping system rather in  
318 mono-cropping system of individual crops.

319 Overall, the differential crop responses for both mixed-cropping and  
320 mono-cropping systems are possibly due to genetic differences among rice cultivars.  
321 However, we acknowledge some uncertainties and limitations in our data. For  
322 example, firstly, we conducted a pot experiment in this study, whereas pot size,  
323 volume, shape, material and even color may influence plant growth [44]. Secondly,  
324 we planted rice in a well-controlled greenhouse, and no pests and diseases were  
325 detected in both growing seasons, however, the disease resistance of mixed-cropping  
326 systems may have more advantages in the field. For example, the effect of mixed  
327 cropping systems for pests in organic oilseed crops were evaluated, and the result  
328 showed that the infestation by insect pests was directly reduced in mixtures with  
329 winter rape (*Brassica napus*) hints and cereals or legumes [45]. Thirdly, with  
330 meticulous management and monitoring, there were few weeds in this pot experiment.  
331 Indeed, there were some biological effects on weeds-suppressing in mixture with  
332 organic linseed (*Linum usitatissimum*) and wheat in the field [45]. Therefore, a field  
333 based evaluation of different rice cultivars under mixed cropping system is needed in  
334 future.

## 335 **Conclusions**

336 In the present study, results showed that the mixed-cropping systems with real mixed-  
337 sowing, mixed-transplanting and finally mixed-harvesting have advantages in yield  
338 related traits and grain quality compared with the corresponding mono-cropping  
339 systems. Relative to the mono-cropping systems, mixed-cropping systems increased  
340 the number of spikelets per panicle, seed-setting rate, and grain weight per pot and  
341 harvest index. Additionally, mixed-cropping systems reduced chalky rice rate and  
342 chalkiness degree. Hence, mixed-cropping system with different rice cultivars would  
343 be more productive with higher quality than the mono-cropping systems.

## 344 **Acknowledgements**

345 We acknowledge the funding provided by the Science and Technology Project of  
346 Guangdong Province (2015B090903077, 2016A020210094), the Science and  
347 Technology Project of Guangzhou (201604020062), the Innovation Team  
348 Construction Project of Modern Agricultural Industry Technology System of  
349 Guangdong Province (2016LM1100), the Overseas Joint Doctoral Training Program  
350 of South China Agricultural University (2018LHPY010).

351 **Supporting information**

352 **S1 Table S1 Traits of the five varieties that accessed from the China Rice Data Center.**

353 Note: Data from: <http://www.ricedata.cn/>

## 354 **References**

- 355 1. Thai PPD, Hiroki K, Ryo I, Takashige I. Estimation of the outcrossing rate for annual Asian  
356 wild rice under field conditions. *Breeding Science*. 2012; 3: 256-262.
- 357 2. Khush GS. What it will take to Feed 5.0 Billion Rice consumers in 2030. *Plant Molecular*  
358 *Biology*. 2005; 1: 1-6.
- 359 3. Qian Q, Guo L, Smith SM, Li J. Breeding high-yield superior quality hybrid super rice by  
360 rational design. *National Science Review*. 2016; 3: 283-294.
- 361 4. Ray DK, Ramankutty N, Mueller ND, West PC, Foley JA. Recent patterns of crop yield  
362 growth and stagnation. *Nature Communications*, 2012; 3: 1293.
- 363 5. Frison EA. From Uniformity to Diversity: A paradigm shift from industrial agriculture to  
364 diversified agro-ecological systems Enter title. International Panel of Experts on Sustainable  
365 Food Systems (IPES-Food). <http://www.ipes-food.org>; 2016.
- 366 6. Lithourgidis AS, Dordas CA, Damalas CA, Vlachostergios DN. Annual intercrops: an  
367 alternative pathway for sustainable agriculture. *Australian Journal of Crop Science*. 2011;  
368 5(4): 396-410.
- 369 7. Malézieux E, Crozat Y, Dupraz C, Laurans M, Makowski D, Ozier-Lafontaine, et al. Mixing  
370 plant species in cropping systems: concepts, tools and models. A review. *Agronomy for*  
371 *Sustainable Development*. 2009; 29(1): 43-62.
- 372 8. Whitmore AP, Schröder JJ. Intercropping reduces nitrate leaching from under field crops  
373 without loss of yield: A modelling study. *European Journal of Agronomy*. 2007; 27(1):  
374 81-88.
- 375 9. Strand JF. Some agrometeorological aspects of pest and disease management for the 21st  
376 century. *Agricultural & Forest Meteorology*. 2000; 103(1): 73-82.
- 377 10. Guziejewski D, Skrzypek S, Ciesielski W. Square wave adsorptive stripping voltammetric  
378 determination of diazinon in its insecticidal formulations. *Environmental Monitoring &*  
379 *Assessment*. 2012; 184(11): 6575-6582.
- 380 11. Badgley C, Moghtader J, Quintero E, Zakem E, Chappell MJ, Aviles-Vazquez K, et al.  
381 Organic agriculture and the global food supply. *Renewable Agriculture & Food Systems*.  
382 2007; 22(2): 86-108.

- 383 12. Popp J, Petó K, Nagy J. Pesticide productivity and food security. A review. *Agronomy for*  
384 *Sustainable Development*. 2013; 33(1): 243-255.
- 385 13. Vandermeer J, Mvan N, Anderson J, Ong C, Perfecto I. Global change and multi-species  
386 agro-ecosystems: concepts and issues. *Agriculture Ecosystems & Environment*. 1998; 67(1):  
387 1-22.
- 388 14. Prieto I, Violle C, Barre P, Durand JL, Ghesquiere M, Litrico I. Complementary effects of  
389 species and genetic diversity on productivity and stability of sown grasslands. *Nature Plants*.  
390 2015; 1(4): 15033.
- 391 15. Cardinale BJ, Wright JP, Cadotte MW, Carroll IT, Hector A, Srivastava DS, et al. Impacts of  
392 plant diversity on biomass production increase through time because of species  
393 complementarity. *Proceedings of the National Academy of Sciences of the United States of*  
394 *America*. 2007; 104(46): 18123-18128.
- 395 16. Hauggaard-Nielsen H, Jensen ES. Facilitative Root Interactions in Intercrops. *Plant and Soil*.  
396 2005; 274(1-2): 237-250.
- 397 17. Trenbath BR. Intercropping for the management of pests and diseases. *Field Crops Research*.  
398 1993; 34(3): 381-405.
- 399 18. Eisenhauer N. Aboveground-belowground interactions as a source of complementarity  
400 effects in biodiversity experiments. *Plant and Soil*. 2012; 351(1-2): 1-22.
- 401 19. George SJ, Harper RJ, Hobbs RJ, Tibbett M, Audet P, Mulligan D, et al. A sustainable  
402 agricultural landscape for Australia: a review of interlacing carbon sequestration, biodiversity  
403 and salinity management in agroforestry systems. *Agriculture Ecosystems & Environment*.  
404 2012; 163(12): 28-36.
- 405 20. Zhu YY, Chen HR, Fan JH, Wang YY, Yan L, Chen JB, et al. Genetic diversity and disease  
406 control in rice. *Nature*. 2000; 406(6797): 718-722.
- 407 21. Tosti G, Guiducci M. Durum wheat-fava bean temporary intercropping: Effects on nitrogen  
408 supply and wheat quality. *European Journal of Agronomy*. 2010; 33(3): 157-165.
- 409 22. Anil L, Park J, Phipps RH, Miller FA. Temperate intercropping of cereals for forage: a  
410 review of the potential for growth and utilization with particular reference to the UK. *Grass*  
411 *& Forage Science*. 2010; 53(4): 301-317.
- 412 23. Peng S, Huang J, Sheehy JE, Laza RC, Visperas RM, Zhong X, et al. Rice yields decline with



- 413 higher night temperature from global warming. Proceedings of the National Academy of  
414 Sciences of the United States of America. 2004; 101(27): 9971-9975.
- 415 24. Cheema NM, Chowdhry MA, Gliddon CJ. Varietal blends and their performance in spring  
416 wheat. Pakistan Journal of Agricultural Research. 1988; 2(9), 141-146.
- 417 25. Helland SJ, Holland JB. Blend response and stability and cultivar blending ability in oat.  
418 Crop Science. 2001; 41(6): 1689-1696.
- 419 26. Pridham JC, Entz MH, Martin RC, Hucl PJ. Weed, disease and grain yield effects of cultivar  
420 mixtures in organically managed spring wheat. Canadian Journal of Plant Science. 2007;  
421 87(4): 855-859.
- 422 27. Kiær LP, Skovgaard IM, Østergård H. Grain yield increase in cereal variety mixtures: A  
423 meta-analysis of field trials. Field Crops Research. 2009; 114(3): 361-373.
- 424 28. Juskiw PE, Helm JH, Burnett PA. Three-component barley mixtures: Ratio effects in  
425 replacement series. Canadian Journal of Plant Science. 2001; 81(4): 651-656.
- 426 29. Darras S, McKenzie Ross RH, Olsonmark MA, Willenborg Christian CJ. Influence of genotypic  
427 mixtures on field pea yield and competitive ability. Canadian Journal of Plant Science. 2014;  
428 95(2): 315-324.
- 429 30. Diaz S, Cabido M. Vive la difference: plant functional diversity matters to ecosystem  
430 processes. Trends in Ecology & Evolution. 2001; 16(11): 646-655.
- 431 31. Tilman D, Wedin D, Knops J. Productivity and sustainability influenced by biodiversity in  
432 grassland ecosystems. Nature. 1996; 379(6567): 718-720.
- 433 32. Dubin HJ, Wolfe MS. Comparative behavior of three wheat cultivars and their mixture in  
434 India, Nepal and Pakistan. Field Crops Research. 1994; 39(2-3): 71-83.
- 435 33. Gallandt ER, Dofing SM, Reisenauer PE, Donaldson E. Diallel Analysis of Cultivar Mixtures  
436 in Winter Wheat. Crop Science. 2001; 41(3): 792-796.
- 437 34. Sarandon SJ, Sarandon R. Mixture of Cultivars: Pilot Field Trial of an Ecological Alternative  
438 to Improve Production or Quality of Wheat (*Triticum aestivum*). Journal of Applied Ecology.  
439 1995; 32(2): 288-294.
- 440 35. Liu J, Wang J, Yao X, Zhang Y, Li J, Wang X, et al. Characterization and fine mapping of  
441 thermo-sensitive chlorophyll deficit mutant1 in rice (*Oryza sativa* L.). Breeding Science.  
442 2015; 65(2): 161-169.

- 443 36. Yamori W, Kondo E, Sugiura D, Terashima I, Suzuki Y, Makino A. Enhanced leaf  
444 photosynthetic as a target to increase grain yield: Insights from transgenic rice lines with  
445 variable Rieske FeS protein content in the Cytochrome *b6/f* complex. *Plant Cell &*  
446 *Environment*. 2016; 39(1): 80-87.
- 447 37. Zhu XG, Song Q, Ort DR. Elements of a dynamic systems model of canopy photosynthetic.  
448 *Current Opinion in Plant Biology*. 2012; 15(3): 237-244.
- 449 38. Gurr GM, Wratten SD, Luna JM. Multi-function agricultural biodiversity: pest management  
450 and other benefits. *Basic & Applied Ecology*. 2003; 4(2): 107-116.
- 451 39. Hayashi M, Hayashi T, Kuno C, Tani T, Endo I, Higashino A, et al. Enhanced Nitrogen  
452 Uptake and Photosynthetic of Rice Grown with Deep and Permanent Irrigation Method:  
453 Possible Mechanism for Chalky Grain Reduction. *Plant Production Science*. 2013; 16(4):  
454 309-316.
- 455 40. Tabata M, Iida Y, Okuno K. Abnormal Grain Quality Caused by Partial Excision of Root  
456 System in Rice. *Japanese Journal of Crop Science*. 2008; 77: 198-203.
- 457 41. Rehmani MIA, Wei G, Hussain N, Ding C, Li G, Liu Z, et al. Yield and quality responses of  
458 two indica rice hybrids to post-anthesis asymmetric day and night open-field warming in  
459 lower reaches of Yangtze River delta. *Field Crops Research*. 2014; 156(2): 231-241.
- 460 42. Shi W, Yin X, Struik PC, Xie F, Schmidt RC, Jagadish KSV. Grain yield and quality  
461 responses of tropical hybrid rice to high night-time temperature. *Field Crops Research*, 2016;  
462 190: 18-25.
- 463 43. Jokinen K. Competition and yield advantage in barley-barley and barley-oats mixtures [in  
464 Finland]. *Journal of Agricultural Science in Finland*. 1991.
- 465 44. Poorter H, Van Dusschoten D, Postma JA. Pot size matters: a meta-analysis of the effects of  
466 rooting volume on plant growth. *Functional Plant Biology*. 2012; 39(10-11): 839-850.
- 467 45. Paulsen HM, Schochow M, Ulber B, Kühne S, Rahmann G. Mixed cropping systems for  
468 biological control of weeds and pests in organic oilseed crops. *Aspects of Applied Biology*.  
469 2006; 79: 215-220.

1 **Table 1**

| Treatments         | The number of spikelet per panicle | Seed-setting rate (%) | Grain weight (g per pot) | 1000-grain -weight(g) | Harvest index |
|--------------------|------------------------------------|-----------------------|--------------------------|-----------------------|---------------|
| Independent t-test |                                    |                       |                          |                       |               |
| Mono-AB            | 46.05±5.72                         | 63.83±1.88            | 52.13±3.63               | 20.11±0.43            | 0.39±0.02     |
| Mixed-AB           | 56.05±1.25                         | 70.14±0.29            | 53.76±3.41               | 18.61±1.12            | 0.45±0.00     |
| Mono-BC            | 50.20±7.39                         | 62.50±1.44            | 51.64±3.30               | 19.37±0.13            | 0.42±0.01     |
| Mixed-BC           | 60.46±2.53                         | 68.09±0.90*           | 61.09±1.92               | 20.70±0.45**          | 0.47±0.02*    |
| Mono-BE            | 53.11±8.78                         | 65.79±2.76            | 49.65±2.41               | 18.86±0.36            | 0.38±0.02     |
| Mixed-BE           | 58.73±0.69                         | 68.66±2.32            | 49.63±1.10               | 17.80±1.01            | 0.37±0.02     |
| Mono-ABD           | 43.09±4.01                         | 66.48±1.81            | 52.97±2.38               | 20.39±0.32            | 0.40±0.01     |
| Mixed-ABD          | 66.24±1.67**                       | 68.92±1.33            | 56.89±1.95               | 18.91±1.02            | 0.39±0.01     |
| Mono-ACD           | 53.75±4.41                         | 68.34±1.09            | 57.82±1.07               | 20.38±0.32            | 0.39±0.01     |
| Mixed-ACD          | 64.21±1.79                         | 77.63±1.84**          | 62.47±0.61*              | 23.25±0.61**          | 0.46±0.01*    |
| Mono-BCE           | 57.46±6.08                         | 65.62±1.84            | 52.74±2.21               | 19.02±0.26            | 0.39±0.01     |
| Mixed-BCE          | 66.23±1.92                         | 73.19±1.56*           | 53.56±2.24               | 18.47±0.40            | 0.42±0.00     |
| Mono-BDE           | 47.80±6.29                         | 67.78±2.06            | 51.32±1.77               | 19.56±0.42            | 0.40±0.01     |
| Mixed-BDE          | 65.19±1.55                         | 74.81±1.20            | 63.49±1.33**             | 20.93±0.25            | 0.46±0.01*    |
| Mono-ABDE          | 50.32±4.85                         | 67.82±1.53            | 53.46±1.79               | 19.88±0.38            | 0.38±0.01     |
| Mixed-ABDE         | 57.58±3.06                         | 77.56±0.59**          | 62.60±0.94*              | 21.23±0.06            | 0.43±0.03     |
| Mono-BCDE          | 52.39±5.23                         | 67.16±1.59            | 53.22±1.65               | 19.51±0.32*           | 0.40±0.01     |
| Mixed-BCDE         | 57.04±1.81                         | 70.40±1.40            | 53.64±1.66               | 17.94±0.60            | 0.39±0.00     |
| Mono-ABCDE         | 53.49±4.21                         | 67.32±1.27            | 54.55±1.54               | 19.78±0.31**          | 0.39±0.01     |
| Mixed-ABCDE        | 55.11±1.17                         | 69.72±2.16            | 56.38±0.67               | 17.49±0.20            | 0.45±0.01*    |
| Paired t-test      |                                    |                       |                          |                       |               |
| Mono-cropping      | 50.77±1.33                         | 66.26±0.59            | 52.95±0.69               | 19.68±0.17            | 0.39±0.00     |
| Mixed-cropping     | 60.68±1.39**                       | 71.91±1.15**          | 57.35±1.52*              | 19.53±0.60            | 0.43±0.01**   |

2

3 **Table 2**

| Treatments         | The number of spikelet per panicle | Seed-setting rate (%) | Grain weight (g per pot) | 1000-grain -weight(g) | Harvest index |
|--------------------|------------------------------------|-----------------------|--------------------------|-----------------------|---------------|
| Independent t-test |                                    |                       |                          |                       |               |
| Mono-AB            | 60.26±3.39                         | 72.47±0.95            | 62.56±1.00               | 21.41±0.65            | 0.44±0.00     |
| Mixed-AB           | 63.06±1.47                         | 74.81±0.81            | 65.60±0.12               | 22.16±0.92            | 0.46±0.01*    |
| Mono-BC            | 60.69±3.60                         | 72.09±0.83            | 62.61±0.92               | 21.36±0.64            | 0.44±0.01     |
| Mixed-BC           | 65.18±0.72                         | 79.98±1.10**          | 72.43±1.62**             | 22.55±0.30            | 0.46±0.01*    |
| Mono-BE            | 61.17±3.76                         | 73.33±1.33            | 61.71±1.84               | 21.07±0.73            | 0.42±0.02     |
| Mixed-BE           | 66.93±1.20                         | 72.41±0.99            | 60.55±2.18               | 22.18±0.74            | 0.44±0.01     |
| Mono-ABD           | 59.71±2.25                         | 73.00±0.69            | 63.04±0.73               | 21.64±0.46            | 0.43±0.00     |
| Mixed-ABD          | 66.17±1.88                         | 76.32±0.81*           | 62.37±1.07               | 20.80±0.34            | 0.45±0.01     |
| Mono-ACD           | 64.86±1.75                         | 74.06±0.36            | 63.12±0.55               | 22.18±0.22            | 0.44±0.01     |
| Mixed-ACD          | 63.57±0.55                         | 76.19±0.54*           | 66.73±1.10**             | 22.68±0.38            | 0.47±0.00*    |
| Mono-BCE           | 63.58±2.75                         | 73.45±0.89            | 62.05±1.23               | 21.43±0.52            | 0.43±0.01     |
| Mixed-BCE          | 63.43±0.37                         | 76.77±0.49            | 65.67±0.80               | 23.39±0.69            | 0.45±0.01     |
| Mono-BDE           | 60.32±2.51                         | 73.58±0.89            | 62.47±1.26               | 21.42±0.53            | 0.42±0.01     |
| Mixed-BDE          | 68.73±1.77                         | 79.10±1.94*           | 67.29±1.01               | 23.69±0.68*           | 0.52±0.03**   |
| Mono-ABDE          | 62.12±2.10                         | 73.79±0.68            | 62.51±0.97               | 21.63±0.41            | 0.42±0.01     |
| Mixed-ABDE         | 68.60±0.68                         | 78.69±1.54**          | 67.83±0.97*              | 21.27±0.19            | 0.49±0.01**   |
| Mono-BCDE          | 62.34±2.16                         | 73.60±0.68            | 62.53±0.95               | 21.60±0.41            | 0.42±0.01     |
| Mixed-BCDE         | 66.34±0.95                         | 78.53±1.37**          | 64.32±0.80               | 22.98±0.23            | 0.45±0.00     |
| Mono-ABCDE         | 63.38±1.82                         | 73.77±0.55            | 62.56±0.79               | 21.73±0.34            | 0.43±0.01     |
| Mixed-ABCDE        | 62.14±1.03                         | 72.64±0.96            | 61.25±0.77               | 21.30±0.70            | 0.42±0.01     |
| Paired t-test      |                                    |                       |                          |                       |               |
| Mono-cropping      | 61.84±0.54                         | 73.31±0.20            | 62.52±0.13               | 21.55±0.09            | 0.43±0.00     |
| Mixed-cropping     | 65.41±0.73**                       | 76.54±0.83**          | 65.40±1.12*              | 22.30±0.30*           | 0.46±0.01**   |

5 **Table 3**

| Treatment          | Brown rice rate (%) | Milled rice rate (%) | Whole milled rice rate (%) | Amylose content (%) | Protein content (%) | Length/width | Chalky rice rate (%) | Chalkiness degree (%) |
|--------------------|---------------------|----------------------|----------------------------|---------------------|---------------------|--------------|----------------------|-----------------------|
| Independent t-test |                     |                      |                            |                     |                     |              |                      |                       |
| Mono-AB            | 80.04±0.34          | 69.87±0.92           | 64.79±1.56                 | 22.97±1.52          | 8.55±0.26           | 2.91±0.03*   | 21.18±2.81           | 7.07±0.48*            |
| Mixed-AB           | 81.38±0.76          | 71.16±1.71           | 63.28±1.05                 | 23.70±0.47          | 8.57±0.64           | 2.75±0.01    | 12.35±0.55           | 4.84±0.48             |
| Mono-BC            | 80.35±0.41          | 69.91±0.93           | 63.37±1.04                 | 21.68±2.16          | 8.57±0.31           | 2.86±0.04    | 22.18±2.43*          | 6.75±0.60             |
| Mixed-BC           | 80.88±0.43          | 70.34±1.16           | 68.21±1.45*                | 22.47±0.29          | 9.35±0.48           | 2.90±0.07    | 12.44±0.82           | 5.02±0.52             |
| Mono-BE            | 79.83±0.53          | 67.91±1.14           | 59.98±1.63                 | 23.22±1.60          | 8.38±0.30           | 2.87±0.04    | 21.05±2.85           | 6.99±0.51*            |
| Mixed-BE           | 80.39±0.82          | 68.47±0.71           | 60.96±1.97                 | 23.99±0.76          | 7.81±0.24           | 2.78±0.07    | 13.30±0.55           | 4.85±0.11             |
| Mono-ABD           | 79.72±0.30          | 69.77±0.61           | 64.70±1.01                 | 21.97±1.26          | 8.72±0.21           | 2.92±0.02    | 18.01±2.41           | 6.40±0.47             |
| Mixed-ABD          | 78.84±0.82          | 69.89±0.96           | 61.75±0.57                 | 19.89±1.06          | 8.37±0.83           | 2.94±0.08    | 12.29±0.26           | 4.87±0.17             |
| Mono-ACD           | 79.68±0.30          | 70.28±0.36           | 65.99±0.69                 | 18.94±0.89          | 8.73±0.19           | 2.90±0.03    | 14.56±0.94**         | 5.55±0.20**           |
| Mixed-ACD          | 82.2±0.17**         | 71.25±1.74           | 69.36±1.59*                | 20.75±0.83          | 10.06±0.18**        | 3.02±0.05    | 6.67±0.81            | 1.50±0.70             |
| Mono-BCE           | 79.99±0.40          | 68.83±0.89           | 61.76±1.41                 | 21.19±1.51          | 8.45±0.24           | 2.86±0.03    | 19.70±2.01           | 6.49±0.42*            |
| Mixed-BCE          | 78.43±0.48          | 67.53±0.12           | 64.76±0.53                 | 18.39±0.69          | 9.74±0.15*          | 2.77±0.05    | 13.93±1.14           | 4.45±0.35             |
| Mono-BDE           | 79.57±0.39          | 68.46±0.80           | 61.49±1.30                 | 22.14±1.31          | 8.61±0.24           | 2.89±0.03    | 17.92±2.42           | 6.35±0.47             |
| Mixed-BDE          | 80.52±1.07          | 70.56±1.79           | 68.05±1.38*                | 19.49±0.42          | 9.07±0.32           | 3.03±0.05*   | 10.71±0.30           | 4.61±0.21             |
| Mono-ABDE          | 79.60±0.29          | 69.00±0.67           | 63.16±1.30                 | 21.53±1.03          | 8.59±0.19           | 2.90±0.02    | 17.19±1.84           | 6.29±0.35             |
| Mixed-ABDE         | 80.48±0.32          | 69.94±1.47           | 67.48±1.22                 | 21.65±0.87          | 9.13±0.34           | 2.96±0.05    | 12.33±0.43           | 5.04±0.08             |
| Mono-BCDE          | 79.76±0.33          | 69.02±0.67           | 62.45±1.11                 | 20.89±1.21          | 8.60±0.20           | 2.88±0.03    | 17.69±1.82           | 6.13±0.37*            |
| Mixed-BCDE         | 80.56±0.73          | 68.04±1.96           | 61.57±0.32                 | 21.31±1.11          | 9.24±0.97           | 2.95±0.06    | 14.99±1.09           | 3.81±0.61             |
| Mono-ABCDE         | 79.74±0.27          | 69.33±0.57           | 63.59±1.08                 | 20.65±0.97          | 8.59±0.17           | 2.89±0.02    | 17.15±1.48           | 6.13±0.29             |
| Mixed-ABCDE        | 80.05±0.62          | 67.64±1.75           | 62.09±0.55                 | 21.68±1.13          | 8.83±0.36           | 2.83±0.04    | 15.78±1.15           | 5.78±0.91             |
| Paired t-test      |                     |                      |                            |                     |                     |              |                      |                       |
| Mono-cropping      | 79.83±0.07          | 69.24±0.23           | 63.13±0.56                 | 21.52±0.39          | 8.58±0.03           | 2.89±0.01    | 18.66±0.74**         | 6.41±0.14**           |
| Mixed-cropping     | 80.27±0.42          | 69.48±0.45           | 64.75±1.02                 | 21.33±0.56          | 9.02±0.21           | 2.89±0.03    | 12.48±0.80           | 4.48±0.37             |

7 **Table 4**

| Treatment          | Brown rice rate (%) | Milled rice rate (%) | Whole milled rice rate (%) | Amylose content (%) | Protein content (%) | Length/width | Chalky rice rate (%) | Chalkiness degree (%) |
|--------------------|---------------------|----------------------|----------------------------|---------------------|---------------------|--------------|----------------------|-----------------------|
| Independent t-test |                     |                      |                            |                     |                     |              |                      |                       |
| Mono-AB            | 76.87±0.24          | 67.73±0.24           | 60.60±0.38                 | 20.40±2.42          | 7.67±0.46           | 2.94±0.02    | 13.38±2.21           | 5.43±0.59*            |
| Mixed-AB           | 74.85±1.53          | 67.48±1.70           | 62.06±0.87                 | 22.91±0.98          | 8.10±0.05           | 3.10±0.06*   | 8.56±0.19            | 3.33±0.36             |
| Mono-BC            | 76.31±0.22          | 67.90±0.27           | 60.94±0.25*                | 23.77±0.91*         | 7.86±0.51           | 3.00±0.02    | 13.46±2.14           | 5.01±0.60             |
| Mixed-BC           | 76.45±1.33          | 71.61±0.00**         | 59.74±0.37                 | 20.53±0.32          | 8.16±0.33           | 3.02±0.09    | 7.67±0.33            | 3.73±0.33             |
| Mono-BE            | 76.03±0.33          | 67.42±0.36           | 60.57±0.33                 | 23.39±1.11          | 7.67±0.47           | 2.95±0.02    | 13.25±2.20           | 6.18±0.24             |
| Mixed-BE           | 77.52±0.88          | 69.36±1.92           | 63.48±1.51*                | 22.69±0.63          | 8.17±0.06           | 3.02±0.04    | 7.08±0.38            | 5.27±0.59             |
| Mono-ABD           | 76.64±0.22          | 67.52±0.26           | 60.60±0.28*                | 21.11±1.62          | 7.82±0.35           | 2.96±0.02    | 11.76±1.65           | 5.30±0.40*            |
| Mixed-ABD          | 75.11±2.40          | 69.12±0.60*          | 58.87±1.05                 | 25.02±0.64          | 8.45±0.41           | 2.99±0.01    | 8.78±0.82            | 3.51±0.53             |
| Mono-ACD           | 76.57±0.26          | 67.43±0.24           | 60.40±0.26                 | 19.78±1.23          | 7.95±0.25           | 2.97±0.02    | 9.16±0.50**          | 4.44±0.36**           |
| Mixed-ACD          | 78.53±0.58**        | 69.45±0.17**         | 64.00±0.27**               | 18.14±0.27          | 8.24±0.18           | 3.13±0.01**  | 4.19±0.95            | 1.41±0.49             |
| Mono-BCE           | 76.09±0.24          | 67.53±0.26           | 60.60±0.25                 | 22.85±0.77*         | 7.80±0.35           | 2.97±0.02    | 12.02±1.56*          | 5.36±0.44**           |
| Mixed-BCE          | 78.09±0.76**        | 67.57±1.95           | 61.96±1.03                 | 18.56±0.27          | 7.51±0.23           | 3.07±0.09    | 5.63±0.95            | 1.46±0.28             |
| Mono-BDE           | 76.08±0.24          | 67.32±0.30           | 60.58±0.25                 | 23.10±0.76          | 7.82±0.36           | 2.96±0.02    | 11.67±1.64*          | 5.80±0.27**           |
| Mixed-BDE          | 78.83±1.01**        | 70.20±0.60**         | 63.58±0.46**               | 24.12±0.58          | 8.55±0.29           | 3.08±0.02**  | 5.10±0.17            | 2.39±0.14             |
| Mono-ABDE          | 76.39±0.24          | 67.34±0.22           | 60.42±0.23                 | 21.08±1.20          | 7.79±0.27           | 2.95±0.01    | 11.10±1.27*          | 5.49±0.33**           |
| Mixed-ABDE         | 78.79±0.24**        | 69.59±0.37**         | 62.15±0.89*                | 23.36±0.56          | 8.71±0.18           | 3.05±0.02**  | 5.32±0.98            | 1.76±0.32             |
| Mono-BCDE          | 76.11±0.20          | 67.43±0.24           | 60.59±0.21                 | 22.77±0.59          | 7.88±0.29           | 2.98±0.01    | 11.14±1.25           | 5.28±0.34**           |
| Mixed-BCDE         | 77.66±1.12*         | 66.55±1.71           | 60.96±0.87                 | 25.26±0.25          | 8.36±0.27           | 2.97±0.03    | 8.41±0.05            | 1.95±0.78             |
| Mono-ABCDE         | 76.35±0.21          | 67.42±0.19           | 60.47±0.20                 | 21.22±0.96          | 7.84±0.23           | 2.96±0.01    | 10.80±1.03           | 5.14±0.32*            |
| Mixed-ABCDE        | 75.73±0.60          | 68.02±1.99           | 59.79±0.40                 | 23.80±0.93          | 8.31±0.01           | 2.97±0.03    | 5.85±0.54            | 2.90±0.88             |
| Paired t-test      |                     |                      |                            |                     |                     |              |                      |                       |
| Mono-cropping      | 76.34±0.09          | 67.50±0.06           | 60.58±0.05                 | 21.95±0.44          | 7.81±0.13           | 2.96±0.00    | 11.77±0.43*          | 5.34±0.15**           |
| Mixed-cropping     | 77.15±0.48          | 68.89±0.47           | 61.66±0.56                 | 22.44±0.80          | 8.25±0.20           | 3.04±0.02    | 6.66±0.52            | 2.77±0.39             |

9 **Table 5**

| Treatments             | Early growing season |         | Late growing season |        |
|------------------------|----------------------|---------|---------------------|--------|
|                        | SPAD index           | Pn      | SPAD index          | Pn     |
| DW                     | 0.85**               | 0.68**  | 0.75**              | 0.44   |
| Spikelet per Panicle   | 0.34                 | -0.02   | 0.18                | 0.48   |
| Seed-setting rate      | 0.58*                | 0.59*   | 0.77**              | 0.75** |
| Grain weight per pot   | 0.74**               | 0.54*   | 0.88**              | 0.60*  |
| 1000-grain-weight      | 0.65**               | 0.29    | 0.45                | 0.58*  |
| Harvest index          | 0.65**               | 0.78**  | 0.73**              | 0.64*  |
| Brown rice rate        | 0.28                 | 0.56*   | 0.55*               | 0.64*  |
| Milled rice rate       | 0.52*                | 0.31    | 0.37                | 0.33   |
| Whole milled rice rate | 0.67**               | 0.56*   | 0.37                | 0.25   |
| Amylose content        | -0.29                | 0.09    | -0.11               | -0.23  |
| Protein content        | 0.53*                | 0.66**  | 0.40                | 0.20   |
| Length/width           | 0.46                 | 0.32    | 0.62*               | 0.21   |
| Chalky rice rate       | -0.76**              | -0.62** | -0.64*              | -0.49  |
| Chalkiness degree      | -0.40                | -0.63*  | -0.65**             | -0.38  |

10 Note: \*and \*\* represent significance at  $P < 0.05$  and  $0.01$  levels, respectively.

11 **Fig. 1**

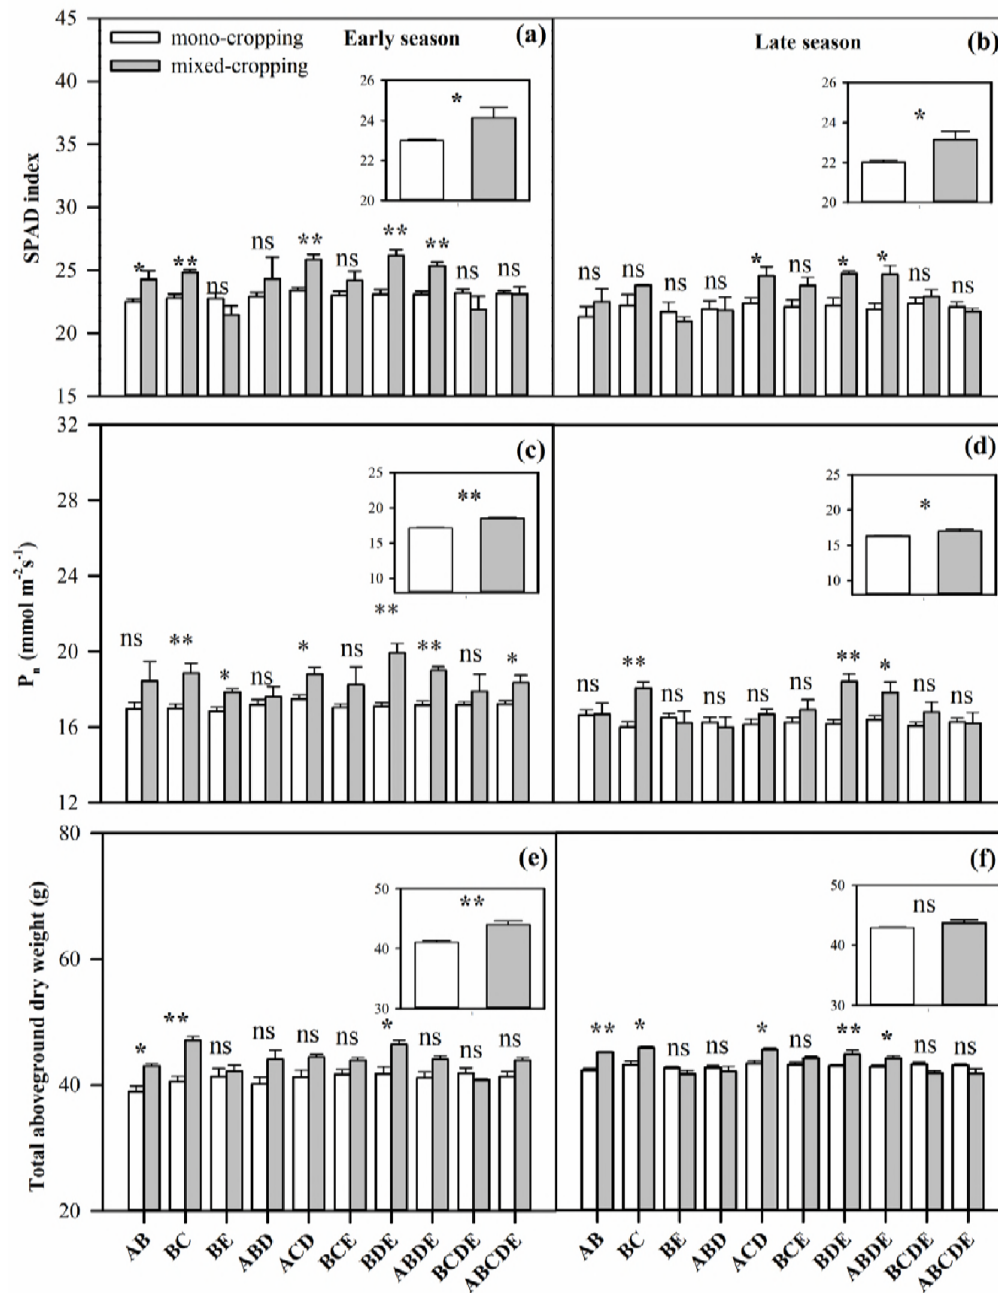

12

13



14 **S1 Table S1**

| Varieties             | Period (d) | Height (cm) | Spikelet per panicle | Seed setting rate (%) | 1000-grain weight (g) | Brown rice rate (%) | Chalky rice (%) | Chalkiness degree (%) | Amylose content (%) | Length/width | Yield (t hm <sup>2</sup> ) |
|-----------------------|------------|-------------|----------------------|-----------------------|-----------------------|---------------------|-----------------|-----------------------|---------------------|--------------|----------------------------|
| Yuenongsimiao (A)     | 111~113    | 97.0~97.9   | 122~124              | 87.1~88.0             | 22.0~22.6             | 71.8~73.0           | 3~6             | 0.5~0.9               | 17.3~18.2           | 3.3~3.5      | 6.57                       |
| Yuxiangyouzhan (B)    | 126~128    | 105.6~106.4 | 133.8                | 81.6~86.0             | 22.6                  | 46.3~47.0           | 13              | 2.6~8.7               | 3.7~26.3            | /            | 6.95                       |
| Huangguangyouzhan (C) | 128~132    | 107.7~110.1 | 133~144              | 84.9~87.2             | 24.5~24.6             | 44.0                | 8~11            | 1.0~2.5               | 13.7~15.9           | 3.1          | 7.62                       |
| Huanghuazhan (D)      | 129~131    | 93.8~102.8  | 118.3~123            | 80.5~86.8             | 22.2~23.1             | 40.0~55.2           | 4~6             | 0.6~3.2               | 13.8~14.0           | /            | 7.20                       |
| Huahang 31 (E)        | 110~111    | 109.5~110.6 | 132.1~132            | 83.5~85.8             | 22~22.3               | 70.4~72.5           | 4~18            | 0.8~6.9               | 16.2~16.5           | /            | 6.31                       |
